CORRECTION *The Journal of Experimental Medicine*

In the article entitled, "J chain is encoded by a single gene unlinked to other immunoglobulin structural genes," by Mayumi Yagi, Peter D'Eustachio, Frank Ruddle, and Marian Elliott Koshland, March 1982, 155:647, mouse chromosome 5 was inadvertently assigned to hybrid cell line BEM 1-6 in Table I. The corrected table appears below.

TABLE I  
*Hybrid Cell Lines Tested for J Chain and  $\alpha$ -Fetoprotein Genes*

| Hybrid        | Mouse chromosomes present*                                 | Reaction with probes |                        |
|---------------|------------------------------------------------------------|----------------------|------------------------|
|               |                                                            | J                    | $\alpha$ -feto-protein |
| BEM 1-6       | 1, 2, 3, 4, 6, 8, 9, 10, 12, 13, 14, 15, 16, 17, 18, 19, X | —                    | —                      |
| BEM 1-4       | 1, 2, 3, 5, 6, 8, 10, 12, 13, 14, 15, 16, 17, 18, 19, X    | +                    | +                      |
| MACH 7A13-3B3 | 2, 5, 7, 9, 12, 13, 14, 15, 17, 18, 19                     | +                    | +                      |
| MACH 4A63     | 2, 7, 12, 13, 15, 16, 17, 18, 19                           | —                    | —                      |
| MACH 4A64 A-1 | 1, 2, 7, 12, 15, 17, 19                                    | —                    | —                      |
| MAE 28A       | 12, X                                                      | —                    | —                      |
| MAE 32        | 16, X                                                      | —                    | —                      |
| ECm4c         | 14, 15                                                     | —                    | —                      |
| R44.1         | 17                                                         | —                    | —                      |

\* Detailed analyses of these cell lines have been published previously (8). All cell lines contained a full set of Chinese hamster (E36) chromosomes. Mouse chromosomes detected at a frequency  $\geq 0.20$  per cell were scored as present. This frequency corresponds to the approximate limit of detection at a single-copy mouse-gene sequence against a diploid or tetraploid Chinese hamster background under our assay conditions (8).
